# Supplementary material for: Misoprostol for primary versus secondary prevention of postpartum haemorrhage: a cluster‐randomised non‐inferiority community trial
Source: PubMed Central journal article supplement (PMC5014137; doi:10.1111/1471-0528.13540), 2015-09-01
Supplement: BJO-123-120-s005.pdf [file BJO-123-120-s005.pdf]

To view the full contents of this document, you need a later version of the PDF viewer. You can upgrade to the latest version of Adobe Reader from [www.adobe.com/products/acrobat/readstep2.html](http://www.adobe.com/products/acrobat/readstep2.html)

For further support, go to [www.adobe.com/support/products/acrreader.html](http://www.adobe.com/support/products/acrreader.html)
